# Supplementary material for: Edin Expression in the Fat Body Is Required in the Defense Against Parasitic Wasps in Drosophila melanogaster
Source: PLoS Pathog. 2015 May 12;11(5):e1004895. doi: 10.1371/journal.ppat.1004895 (PMC4429011; doi:10.1371/journal.ppat.1004895)
Supplement: S1 Table — (XLSX) [file ppat.1004895.s004.xlsx]

## Sheet: read me
	crosses analysed:
	me	me x me
	edin	me;Fb x me;edin_KK
	abbreviations:
	me = msnF9momCherry, eaterGFP
	me;Fb = msnF9momCherry,eaterGFP; FbGAL4
	me;edin_KK = msnF9momCherry, eaterGFP; edin_KK109528
	Tubulin = anti-alpha-tubulin antibody staining
	Actin = Phalloidin staining
	ch4 = ImageJ channel of Phallodin staining
	ch0 = ImageJ staining of alpha-Tubulin staining

## Sheet: data
type	image name	cell number	Tubulin [ch0]	Actin [ch4]	ratio [tub/Act]			mean	SD
edin	2a	1	40.572	53.147	0.763392		edin	0.422156	0.182562
edin	2a	2	108.169	317.768	0.340402		me	0.464434	0.211097
edin	2a	3	103.792	215.712	0.48116
edin	2a	4	182.435	481.098	0.379205
edin	2a	5	22.509	73.016	0.308275
edin	2a	6	72.182	241.556	0.298821
edin	2a	7	65.165	225.022	0.289594
edin	1a	1	67.249	254.478	0.264263
edin	1a	2	44.532	71.209	0.62537
edin	1a	3	58.496	333.051	0.175637
edin	1a	4	77.948	349.516	0.223017
edin	1a	6	37.932	137.208	0.276456
edin	2b	1	67.458	168.54	0.400249
edin	2b	2	22.023	22.023	1
edin	2b	3	54.258	144.503	0.37548
edin	2b	4	54.189	86.563	0.626006
edin	2b	5	107.266	173.959	0.616617
edin	2b	6	61.275	81.422	0.752561
edin	3c	1	105.112	200.567	0.524074
edin	3c	2	73.571	198.761	0.370148
edin	3c	3	122.619	469.635	0.261094
edin	3c	4	129.288	469.148	0.27558
edin	3c	5	236.137	626.156	0.377122
edin	3c	6	168.61	380.849	0.442721
edin	3c	7	111.92	232.594	0.481182
edin	3d	1	79.129	498.813	0.158635
edin	3d	2	29.734	42.309	0.702782
edin	3d	3	28.414	41.336	0.687391
edin	3d	4	48.006	92.399	0.519551
edin	3d	5	80.797	302.831	0.266806
edin	3d	6	88.647	182.435	0.48591
edin	3d	7	73.78	177.78	0.415007
edin	3d	8	106.363	329.231	0.323065
edin	3d	9	110.809	272.194	0.407096
edin	3e	1	45.505	126.301	0.36029
edin	3e	2	26.122	42.726	0.611384
edin	3e	3	72.251	188.201	0.383903
edin	3e	4	87.327	392.728	0.22236
edin	3e	5	58.426	128.177	0.455823
edin	3e	6	28.901	45.157	0.640012
edin	4a	1	62.039	328.536	0.188835
edin	4a	2	77.184	189.174	0.408005
edin	4a	3	47.519	142.975	0.332359
edin	4a	4	31.402	46.686	0.672621
edin	4a	5	63.915	387.935	0.164757
edin	4a	6	14.033	35.709	0.392982
edin	4a	7	43.004	105.39	0.408046
edin	4b	1	58.565	105.737	0.553874
edin	4b	2	70.723	338.123	0.209164
edin	4b	3	184.867	497.493	0.371597
edin	4b	4	83.853	185.77	0.451381
edin	4b	5	123.87	218.561	0.566753
edin	4b	6	86.007	188.757	0.455649
edin	4b	7	127.413	569.953	0.22355
edin	5a	1	25.357	35.709	0.710101
edin	5a	2	25.566	30.012	0.851859
edin	5a	3	41.475	103.792	0.399597
edin	5a	4	20.147	112.476	0.179123
edin	5a	5	53.702	180.559	0.297421
edin	5a	6	32.861	72.321	0.454377
edin	5a	7	94.9	192.3	0.4935
edin	5a	8	7.573	103.861	0.0729148
edin	5b	1	52.938	67.319	0.786375
edin	5b	2	64.262	85.59	0.750812
edin	5b	3	2.779	11.532	0.240982
edin	5b	4	67.111	175.557	0.382275
edin	5b	5	108.586	278.099	0.390458
edin	5b	6	37.585	37.585	1
edin	5b	7	54.189	82.464	0.657123
edin	5b	8	69.75	81.074	0.860325
edin	6a	1	65.026	119.354	0.544816
edin	6a	2	42.1	110.809	0.379933
edin	6a	3	67.736	238.221	0.284341
edin	6a	4	73.919	203.068	0.364011
edin	6a	5	84.687	132.623	0.638554
edin	6a	6	58.149	82.95	0.701013
edin	6a	7	98.095	314.085	0.31232
edin	6a	8	75.378	178.336	0.422674
edin	6a	9	81.978	241.348	0.339667
edin	7a	1	77.392	349.03	0.221735
edin	7a	2	122.411	269.206	0.454711
edin	7a	3	45.018	131.581	0.342131
edin	7a	4	36.543	135.194	0.2703
edin	7a	5	78.643	228.912	0.343551
edin	7a	6	88.994	193.62	0.459632
edin	1b	1	66.972	200.289	0.334377
edin	1b	2	64.471	285.532	0.225793
edin	1b	3	103.445	235.026	0.440143
edin	1b	4	71.835	131.928	0.544502
edin	1c	1	82.672	268.303	0.308129
edin	1c	2	67.875	247.67	0.274054
edin	1c	3	82.603	405.998	0.203457
edin	1c	4	41.545	105.946	0.392134
edin	1c	5	40.433	69.403	0.582583
edin	1c	6	91.356	245.169	0.372625
edin	1c	7	31.957	54.883	0.582275
edin	3a	1	54.814	277.682	0.197398
edin	3a	2	55.786	94.552	0.590003
edin	3a	3	111.295	265.455	0.419261
edin	3a	4	117.687	355.213	0.331314
edin	3a	5	76.837	195.704	0.392618
edin	3b	1	51.549	229.19	0.224918
edin	3b	2	91.426	335.83	0.272239
edin	3b	3	51.34	134.499	0.381713
edin	3b	4	66.972	213.836	0.313193
edin	3b	5	127.83	351.67	0.363494
edin	3b	6	93.857	346.668	0.27074
edin	7b	1	88.786	265.316	0.334642
edin	7b	2	78.712	258.716	0.304241
edin	7b	3	76.489	138.667	0.551602
edin	7b	4	92.051	389.324	0.236438
edin	7b	5	76.142	213.559	0.356538
edin	7b	6	124.078	377.653	0.32855
me	1d	1	53.355	170.833	0.312323
me	1d	2	73.363	332.079	0.22092
me	1d	3	86.702	354.449	0.244611
me	1d	4	53.841	232.803	0.231273
me	1d	5	101.013	432.606	0.233499
me	1d	6	82.603	224.466	0.367998
me	1b	1	46.338	112.685	0.411217
me	1b	2	45.921	108.169	0.42453
me	1b	3	50.854	148.254	0.343019
me	1b	4	78.226	206.472	0.37887
me	1b	5	51.965	93.58	0.5553
me	1b	6	38.696	117.27	0.329974
me	1b	7	103.236	254.478	0.405678
me	1b	8	51.34	142.349	0.360663
me	1b	9	65.582	263.44	0.248945
me	1c	1	89.967	334.094	0.269286
me	1c	2	66.207	194.384	0.340599
me	1c	3	83.298	226.272	0.368132
me	1c	4	70.237	113.796	0.617219
me	1c	5	58.843	154.646	0.380501
me	1c	6	82.95	248.712	0.333518
me	1e	1	47.658	150.269	0.317151
me	1e	2	73.016	276.084	0.26447
me	1e	3	64.887	149.297	0.434617
me	1e	4	74.544	238.499	0.312555
me	1e	5	62.664	227.662	0.27525
me	1e	6	36.543	28.484	1.28293
me	1f	1	96.497	258.924	0.372685
me	1f	2	41.892	61.066	0.686012
me	1f	3	75.795	224.813	0.337147
me	1f	4	83.645	156.8	0.53345
me	1f	5	48.006	70.098	0.684841
me	1f	6	73.919	163.122	0.453152
me	1f	7	60.511	161.454	0.374788
me	1f	8	71.209	168.263	0.423201
me	1g	1	81.213	177.502	0.457533
me	1g	2	64.748	158.467	0.40859
me	1g	3	67.111	287.13	0.23373
me	1g	4	53.216	99.554	0.534544
me	1g	5	67.875	202.86	0.33459
me	1g	6	74.961	161.315	0.464687
me	1g	7	57.037	89.828	0.634958
me	1h	1	50.576	88.161	0.573678
me	1h	2	57.523	150.061	0.383331
me	1h	3	66.346	229.398	0.289218
me	1h	4	67.944	172.778	0.393245
me	1h	5	63.29	105.598	0.599348
me	1h	6	63.706	233.775	0.27251
me	1a	1	47.241	60.163	0.785217
me	1a	2	60.788	82.325	0.738391
me	1a	3	96.775	196.329	0.492923
me	1a	4	83.992	150.755	0.557142
me	1a	5	67.18	117.061	0.573889
me	1a	6	96.845	256.354	0.377778
me	1a	7	25.913	45.088	0.574721
me	1a	8	69.334	233.914	0.296408
me	2a	1	67.527	424.686	0.159005
me	2a	2	70.515	311.584	0.226311
me	2a	3	89.55	224.952	0.398085
me	2a	4	165.206	379.807	0.434974
me	2a	5	106.71	601.841	0.177306
me	2a	6	71.974	185.77	0.387436
me	2a	7	84.062	207.445	0.405225
me	2b	1	83.298	177.919	0.468179
me	2b	2	105.181	309.222	0.340147
me	2b	3	159.717	540.149	0.295691
me	2b	4	22.509	46.408	0.485024
me	2b	5	109.002	190.563	0.572
me	2b	6	145.962	333.19	0.438074
me	2b	7	58.635	73.919	0.793233
me	2b	8	80.658	189.035	0.426683
me	2c	1	174.029	432.119	0.402734
me	2c	2	94.135	198.344	0.474605
me	2c	3	69.542	273.514	0.254254
me	2c	4	29.456	43.212	0.681663
me	2c	5	37.168	32.722	1.13587
me	2c	6	78.99	286.644	0.275568
me	2c	7	170.138	632.617	0.268943
me	2d	1	78.573	281.433	0.279189
me	2d	2	92.468	186.464	0.495903
me	2d	3	168.402	432.119	0.389712
me	2d	4	79.963	124.842	0.640514
me	2d	5	77.879	156.174	0.498668
me	2d	7	41.961	46.686	0.898792
me	2d	8	93.51	255.034	0.366657
me	3a	1	80.31	118.59	0.677207
me	3a	2	85.034	233.289	0.364501
me	3a	3	56.064	83.645	0.670261
me	3a	4	201.679	302.136	0.667511
me	3a	5	227.384	404.052	0.562759
me	3a	6	189.174	274.139	0.690066
me	3b	1	61.9	153.465	0.403349
me	3b	2	49.464	139.154	0.355462
me	3b	3	119.423	464.633	0.257027
me	3b	4	68.917	232.525	0.296385
me	3b	5	55.995	164.719	0.339943
me	3b	6	42.17	155.827	0.270621
me	3b	7	83.645	269.345	0.31055
me	3b	8	80.38	170.555	0.471285
me	3c	1	56.759	91.704	0.618937
me	3c	2	92.329	307.069	0.300678
me	3c	3	74.683	119.493	0.624999
me	3c	4	81.63	304.915	0.267714
me	3c	5	118.59	313.252	0.378577
me	3c	6	84.757	241.07	0.351587
me	3c	7	117.825	415.168	0.283801
me	3c	8	27.65	42.517	0.650328
me	3d	1	91.843	318.462	0.288395
me	3d	2	74.752	189.869	0.393703
me	3d	3	212.794	495.27	0.429653
me	3d	4	149.227	334.788	0.445736
me	3d	5	72.738	98.721	0.736804
me	3d	6	76.628	180.212	0.42521
me	4a	1	416.419	877.577	0.47451
me	4a	2	339.374	623.864	0.543987
me	4a	3	251.56	384.114	0.65491
me	4a	4	73.571	84.479	0.870879
me	4a	5	124.495	167.776	0.742031
me	4a	6	137.417	207.584	0.661983
me	4b	1	300.955	621.571	0.484184
me	4b	2	53.077	95.038	0.558482
me	4b	3	132.276	366.259	0.361154
me	4b	4	130.469	225.647	0.5782
me	4b	5	85.382	394.535	0.216412
me	5a	1	36.056	56.62	0.636807
me	5a	2	144.295	493.672	0.292289
me	5a	3	33.416	190.563	0.175354
me	5a	4	109.35	590.1	0.185308
me	5a	5	79.407	148.81	0.533613
me	5a	6	33.138	29.04	1.14112
me	5a	7	55.786	90.662	0.615318
me	5a	8	131.234	233.289	0.562538
me	5a	9	65.443	309.848	0.21121
me	5b	1	62.247	118.59	0.524892
me	5b	2	126.787	268.65	0.471941
me	5b	3	77.115	106.154	0.726445
me	5b	4	104.07	73.363	1.41856
me	5b	5	79.129	292.41	0.27061
me	5b	6	48.77	80.936	0.602575
me	5b	8	106.015	133.318	0.795204
